# Supplementary material for: RB1 is the crucial target of the Merkel cell polyomavirus Large T antigen in Merkel cell carcinoma cells
Source: PubMed Central journal article supplement (PMC5078066; doi:10.18632/oncotarget.8793), 2016-04-18
Supplement: oncotarget-07-32956-s001.pdf [file oncotarget-07-32956-s001.pdf]

## RB1 is the crucial target of the Merkel cell polyomavirus Large T antigen in Merkel cell carcinoma cells

### SUPPLEMENTARY FIGURE AND TABLES

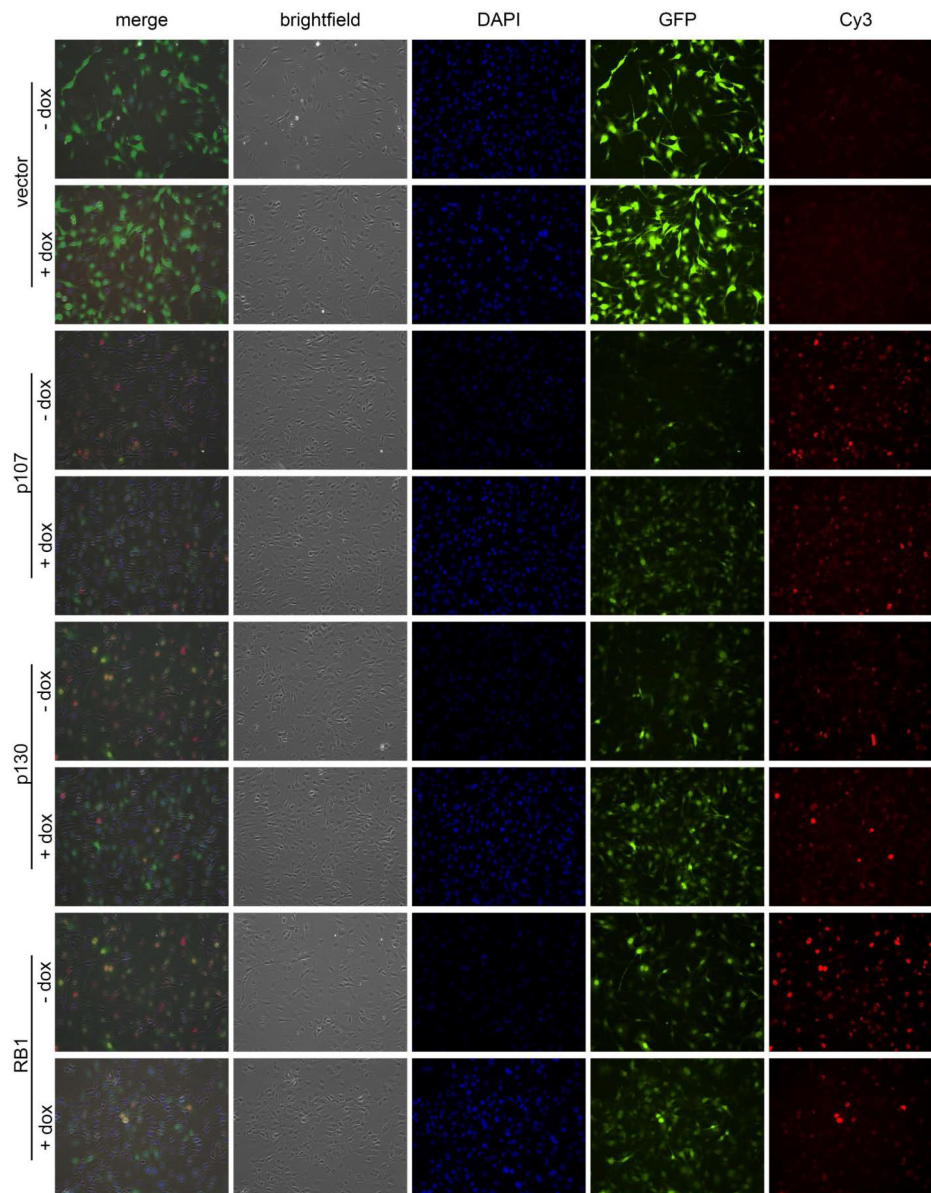

**Supplementary Figure S1: (corresponding to Figure 5 b, c and d): Detection of ectopic PP expression in MEF-TKO cells by Immunofluorescence.** PP triple knockout mouse embryonic fibroblasts (MEF-TKO) were manipulated for Dox-inducible expression of V5-tagged MCPyV-LT<sup>278</sup>. His-tagged versions of the different PPs in a vector co-expressing GFP were lentivirally transferred and 14 h later Dox-treatment was started. Following further 24 hours later cells were fixed with 4% formalin and subjected to immunofluorescence analysis using a His-Tag primary antibody and a Cy3 conjugated secondary antibody. Cell nuclei were stained with Dapi and by visualization of green fluorescence infection of the cells was monitored.

**Supplementary Table S1: shRNA sequences**

---

|                 |                                                                   |
|-----------------|-------------------------------------------------------------------|
| <b>MCPyV-TA</b> | ATCCACAAGCTCAGAAGTGACTTCTCTATTCAAGAGATAGAGAAGTCACTTCTGAGCTTGTGGAT |
| <b>RB1</b>      | GTTAGGACTGTTATGAACACCTTGTTATGAACACCTTCCTGTCAGAGTGTCATAACAGTCCTAAC |
| <b>p107</b>     | GATGTTGTCAGTGAAAGAGCTCGAGCTCTTTCACTGACAACATC                      |
| <b>p130</b>     | GAGCAGAGCTTAATCGAATTTGAAAAATTCGATTAAGCTCTGCTC                     |

---

Supplementary Table S2: Real time PCR primers

| <i>human</i>           |                          |                          |                |
|------------------------|--------------------------|--------------------------|----------------|
|                        | forward                  | reverse                  | PCR efficiency |
| <b>CCNB1</b>           | CGCCTGAGCCTATTTTGGT      | GCACATCCAGATGTTTCCATT    | 100,0%         |
| <b>huCDC6</b>          | CCTGTTCTCCTCGTGTA AAAAGC | GTGTTGCATAGGTTGTCATCG    | 95,2%          |
| <b>PLK1</b>            | AAGATCTGGAGGTGAAAATAGGG  | AGGAGTCCCACACAGGGTCT     | 113,3 %        |
| <b>MYB</b>             | TCCACACTGCCCAAGTCTCT     | AGCAAGCTGTTGTCTTCTTTGA   | 87,4%          |
| <b>RPLP0</b>           | CCATCAGCACCACAGCCTTC     | GGCGACCTGGAAGTCCA ACT    | 87,9%          |
| <b>p130</b>            | AGGCCCTGGCTGGAAGTCTGA    | GGCCACCTGGGGAAATCTGTTGAA | 112,1%         |
| <b>p107</b>            | TTACCACGAAGCCGGAAGCAGAGG | AGTCATCCCCAATCATCCGAAAAT | 102,1%         |
| <b>RB1</b>             | TATTAGCTAAAGGGGAAGTATT   | ACATGGGAGGTGAGAGTTTA     | 118,4%         |
| <b><i>RB1</i> gene</b> | GGTTTGGCAGAGAAGGCAGAA    | AAAAAGTGGGGAAAGGGTAT     | 102,3%         |
| <i>murine</i>          |                          |                          |                |
|                        | forward                  | reverse                  |                |
| <b>MYBL2</b>           | TGAGGCCCGAGAAGCAGAAGAGAA | CAGGGGTTTGGGCATGGTAGAGGA | 112,4%         |
| <b>CCNB1</b>           | GCCAAGCGTGTGCCTGTGA      | GCTCTTCGCTGACTTTATTACCA  | 100,2%         |
| <b>MKI67</b>           | GCCCAGGCAGTCCATAAAAC     | GCGGGGCTGCCAACATCC       | 92,6%          |
| <b>muRPL37</b>         | TAGAAGCAAGATGACGAAGG     | GTCGACTTCTGAAGGTGGTAG    | 88,2%          |
